# Supplementary material
Source: Research Square preprint supplement (doi:10.21203/rs.3.rs-9895708/v1)
Supplement: Supplementary file 1 [file 667db632e998911f3a06797b.xlsx]

## Sheet: Sheet2
Anova: Single Factor
SUMMARY
Groups	Count	Sum	Average	Variance
Column 1	5	0.922	0.1844	0.0001088
Column 2	5	1.038	0.2076	0.0001153
ANOVA
Source of Variation	SS	df	MS	F	P-value	F crit
Between Groups	0.0013456	1	0.0013456	12.0089	0.00850015	5.31766
Within Groups	0.0008964	8	0.00011205
Total	0.002242	9

## Sheet: Sheet3
Anova: Single Factor
SUMMARY
Groups	Count	Sum	Average	Variance
Column 1	4	0.807	0.20175	2.95833e-05
Column 2	4	0.755	0.18875	1.89167e-05
ANOVA
Source of Variation	SS	df	MS	F	P-value	F crit
Between Groups	0.000338	1	0.000338	13.9381	0.00969788	5.98738
Within Groups	0.0001455	6	2.425e-05
Total	0.0004835	7

## Sheet: Sheet4
Anova: Single Factor
SUMMARY
Groups	Count	Sum	Average	Variance
Column 1	4	0.821	0.20525	0.000116917
Column 2	4	0.807	0.20175	2.95833e-05
ANOVA
Source of Variation	SS	df	MS	F	P-value	F crit
Between Groups	2.45e-05	1	2.45e-05	0.334471	0.584077	5.98738
Within Groups	0.0004395	6	7.325e-05
Total	0.000464	7

## Sheet: Sheet5
Anova: Single Factor
SUMMARY
Groups	Count	Sum	Average	Variance
Column 1	1	0.196	0.196	#DIV/0!
Column 2	1	0.196	0.196	#DIV/0!
Column 3	1	0.183	0.183	#DIV/0!
Column 4	1	0.19	0.19	#DIV/0!
Column 5	1	0.196	0.196	#DIV/0!
ANOVA
Source of Variation	SS	df	MS	F	P-value	F crit
Between Groups	0.0001328	4	3.32e-05	65535	#NUM!	#NUM!
Within Groups	0	0	65535
Total	0.0001328	4

## Sheet: Sheet6
Anova: Single Factor
SUMMARY
Groups	Count	Sum	Average	Variance
Column 1	1	0.19	0.19	#DIV/0!
Column 2	1	0.196	0.196	#DIV/0!
ANOVA
Source of Variation	SS	df	MS	F	P-value	F crit
Between Groups	1.8e-05	1	1.8e-05	65535	#NUM!	#NUM!
Within Groups	0	0	65535
Total	1.8e-05	1

## Sheet: Sheet7
	Column 1	Column 2	Column 3	Column 4	Column 5
Column 1	1
Column 2	#DIV/0!	1
Column 3	#DIV/0!	#DIV/0!	1
Column 4	#DIV/0!	#DIV/0!	#DIV/0!	1
Column 5	#DIV/0!	#DIV/0!	#DIV/0!	#DIV/0!	1

## Sheet: Sheet8
	Row 1
Row 1	1

## Sheet: Sheet9
Anova: Single Factor
SUMMARY
Groups	Count	Sum	Average	Variance
Column 1	9	1.78	0.197778	0.000819444
Column 2	9	1.9	0.211111	0.000861111
ANOVA
Source of Variation	SS	df	MS	F	P-value	F crit
Between Groups	0.0008	1	0.0008	0.952066	0.343717	4.494
Within Groups	0.0134444	16	0.000840278
Total	0.0142444	17

## Sheet: Sheet10
Anova: Single Factor
SUMMARY
Groups	Count	Sum	Average	Variance
Column 1	11	2.31	0.21	0.0007
Column 2	11	2.101	0.191	0.000429
Column 3	0	0	#DIV/0!	#DIV/0!
ANOVA
Source of Variation	SS	df	MS	F	P-value	F crit
Between Groups	0.0019855	2	0.00099275	1.6707	0.21459	3.52189
Within Groups	0.01129	19	0.000594211
Total	0.0132755	21

## Sheet: Sheet11
Anova: Single Factor
SUMMARY
Groups	Count	Sum	Average	Variance
Column 1	11	2.222	0.202	0.000456
Column 2	11	2.365	0.215	0.000765
ANOVA
Source of Variation	SS	df	MS	F	P-value	F crit
Between Groups	0.0009295	1	0.0009295	1.52252	0.231542	4.35124
Within Groups	0.01221	20	0.0006105
Total	0.0131395	21

[truncated: 5 more sheets: Sheet12, Sheet13, Sheet14, Sheet15, Sheet1]
