# Supplementary material
Source: Research Square preprint supplement (doi:10.21203/rs.3.rs-9895708/v1)
Supplement: Supplementary file 2 [file 7c76df7913080262d95fcb45.xlsx]

## Sheet: Sheet1
				Drug	IC₅₀ (µg/mL)
				Glucantime	16
				Rapamycin	29
				Rapamycin Loaded Niosomes	25
