# Supplementary material
Source: Research Square preprint supplement (doi:10.21203/rs.3.rs-9895708/v1)
Supplement: Supplementary file 3 [file bec0e5d9f5a6fc8b7e399985.xlsx]

## Sheet: Sheet1
					Treatments	IC₅₀ (µg/mL)
					Glucantime (Standard)	13.9
					Rapamycin	15.1
					Rapamycin Loaded Niosomes	14.8
